# Supplementary material for: ABC transporters P-gp and Bcrp do not limit the brain uptake of the novel antipsychotic and anticonvulsant drug cannabidiol in mice
Source: PeerJ. 2016 May 26;4:e2081. doi: 10.7717/peerj.2081 (PMC4888295; doi:10.7717/peerj.2081)
Supplement: Data S1 [file peerj-04-2081-s001.xlsx]

## Sheet: CBD data - All genotype 021015.
Animal ID	Genotype	Time	Genotype + time	CBD plasma conc.	Genotype	Time	Genotype + time	CBD brain conc.	Genotype + time	Brain/Plasma ratio
KO 1BCRP1	BCRP	one	BCRP one	344.1	BCRP	one	BCRP one	1012.8	BCRP one	2.94333
K2 2BCRP1	BCRP	one	BCRP one	392.5	BCRP	one	BCRP one	1404.3	BCRP one	3.57783
I0 3BCRP1	BCRP	one	BCRP one	152.8	BCRP	one	BCRP one	421.7	BCRP one	2.75982
I2 4BCRP1	BCRP	one	BCRP one	115.1	BCRP	one	BCRP one	373.4	BCRP one	3.24414
P0 5BCRP1	BCRP	one	BCRP one	162.1	BCRP	one	BCRP one	447.2	BCRP one	2.75879
P1 6BCRP1	BCRP	one	BCRP one	162.2	BCRP	one	BCRP one	381.7	BCRP one	2.35327
K1 1BCRP2	BCRP	two	BCRP two	154.8	BCRP	two	BCRP two	417.5	BCRP two	2.69703
K3 2BCRP2	BCRP	two	BCRP two	185.2	BCRP	two	BCRP two	515.8	BCRP two	2.7851								`
M0 3BCRP2	BCRP	two	BCRP two	116.7	BCRP	two	BCRP two	124.4	BCRP two	1.06598
X0 4BCRP2	BCRP	two	BCRP two	99.1	BCRP	two	BCRP two	329.1	BCRP two	3.32089
X1 5BCRP2	BCRP	two	BCRP two	116.8	BCRP	two	BCRP two	175.8	BCRP two	1.50514
X2 6BCRP2	BCRP	two	BCRP two	88.1	BCRP	two	BCRP two	188.6	BCRP two	2.14075
M1 1BCRP3	BCRP	three	BCRP three	59.6	BCRP	three	BCRP three	88.7	BCRP three	1.48826
E0 2BCRP3	BCRP	three	BCRP three	81	BCRP	three	BCRP three	186.8	BCRP three	2.30617
E1 3BCRP3	BCRP	three	BCRP three	79.4	BCRP	three	BCRP three	174.4	BCRP three	2.19647
X3 4BCRP3	BCRP	three	BCRP three	56	BCRP	three	BCRP three	109.6	BCRP three	1.95714
X4 5BCRP3	BCRP	three	BCRP three	63.2	BCRP	three	BCRP three	106	BCRP three	1.67722
X5 6BCRP3	BCRP	three	BCRP three	44	BCRP	three	BCRP three	178.5	BCRP three	4.05682
1 1PGP1	PGP	one	PGP one	125	PGP	one	PGP one	383.5	PGP one	3.068
2 2PGP1	PGP	one	PGP one	207.2	PGP	one	PGP one	698.8	PGP one	3.37259
A2 3PGP1	PGP	one	PGP one	194.25	PGP	one	PGP one	809.2	PGP one	4.16577
A3 4PGP1	PGP	one	PGP one	217.6	PGP	one	PGP one	763.3	PGP one	3.50781
A4 5PGP1	PGP	one	PGP one	345.8	PGP	one	PGP one	896.6	PGP one	2.59283
A5 6PGP1	PGP	one	PGP one	55.1	PGP	one	PGP one	143.6	PGP one	2.60617
A0 1PGP2	PGP	two	PGP two	118.1	PGP	two	PGP two	192.4	PGP two	1.62913
A1 2PGP2	PGP	two	PGP two	132.6	PGP	two	PGP two	238.4	PGP two	1.79789
F0 3PGP2	PGP	two	PGP two	113.6	PGP	two	PGP two	186.6	PGP two	1.64261
F2 5PGP2	PGP	two	PGP two	103.6	PGP	two	PGP two	156.5	PGP two	1.51062
F3 6PGP2	PGP	two	PGP two	139	PGP	two	PGP two	249.5	PGP two	1.79496
D0 1PGP3	PGP	three	PGP three	34.8	PGP	three	PGP three	41.4	PGP three	1.18966
D1 2PGP3	PGP	three	PGP three	43.5	PGP	three	PGP three	62.8	PGP three	1.44368
D3 4PGP3	PGP	three	PGP three	63	PGP	three	PGP three	100.5	PGP three	1.59524
D4 5PGP3	PGP	three	PGP three	31.5	PGP	three	PGP three	34.9	PGP three	1.10794
D5 6PGP3	PGP	three	PGP three	99	PGP	three	PGP three	144.7	PGP three	1.46162
K4 1FVB1	FVB	one	FVB one	368.3	FVB	one	FVB one	955.9	FVB one	2.59544
H2 2FVB1	FVB	one	FVB one	134.4	FVB	one	FVB one	400.8	FVB one	2.98214
H4 3FVB1	FVB	one	FVB one	172.5	FVB	one	FVB one	451.7	FVB one	2.61855
1 4FVB1	FVB	one	FVB one	244	FVB	one	FVB one	166.2	FVB one	0.681148
2 5FVB1	FVB	one	FVB one	546	FVB	one	FVB one	725.8	FVB one	1.3293
P2 6FVB1	FVB	one	FVB one	321.8	FVB	one	FVB one	1181.6	FVB one	3.67185
fvb 1 hr 5469	FVB	one	FVB one	74.2	FVB	one	FVB one	1001.81	FVB one	13.5015
fvb 1 hr 5470	FVB	one	FVB one	409	FVB	one	FVB one	238.37	FVB one	0.582812
H3 1FVB2	FVB	two	FVB two	117	FVB	two	FVB two	216.1	FVB two	1.84701
K5 2FVB2	FVB	two	FVB two	136.7	FVB	two	FVB two	292.6	FVB two	2.14045
H1 3FVB2	FVB	two	FVB two	154	FVB	two	FVB two	326.4	FVB two	2.11948
1 4FVB2	FVB	two	FVB two	101.8	FVB	two	FVB two	163.5	FVB two	1.60609
F4 5FVB2	FVB	two	FVB two	125	FVB	two	FVB two	264.8	FVB two	2.1184
F5 6FVB2	FVB	two	FVB two	128.3	FVB	two	FVB two	278.7	FVB two	2.17225
1 1FVB3	FVB	three	FVB three	124.8	FVB	three	FVB three	106.9	FVB three	0.856571
2 2FVB3	FVB	three	FVB three	112.6	FVB	three	FVB three	199.2	FVB three	1.76909
5 3FVB3	FVB	three	FVB three	136.5	FVB	three	FVB three	427.2	FVB three	3.12967
6 4FVB3	FVB	three	FVB three	97.7	FVB	three	FVB three	232.7	FVB three	2.38178
X6 5FVB3	FVB	three	FVB three	109.3	FVB	three	FVB three	200.8	FVB three	1.83715
X7 6FVB3	FVB	three	FVB three	90.1	FVB	three	FVB three	176.9	FVB three	1.96337
1 hr 20.1.0	DKO	one	DKO one		DKO	one	DKO one	758.9	DKO one
1 hr 20.1.2	DKO	one	DKO one		DKO	one	DKO one	327.7	DKO one
1 hr 20.1.4	DKO	one	DKO one	283.4	DKO	one	DKO one	593	DKO one	2.09245
1 hr 5450	DKO	one	DKO one	188.7	DKO	one	DKO one	425	DKO one	2.25225
1 hr 5451	DKO	one	DKO one	189.5	DKO	one	DKO one	571.6	DKO one	3.01636
1 hr 5452	DKO	one	DKO one	162.3	DKO	one	DKO one	346.1	DKO one	2.13247
1 hr 7113	DKO	one	DKO one	492.4	DKO	one	DKO one	1107.5	DKO one	2.24919
1 hr 7114	DKO	one	DKO one	356.3	DKO	one	DKO one	585.1	DKO one	1.64216
2 hr 19.1.0	DKO	two	DKO two	69.1	DKO	two	DKO two	117	DKO two	1.6932
2 hr 19.1.2	DKO	two	DKO two	88.4	DKO	two	DKO two	117	DKO two	1.32353
2 hr 20.1.1	DKO	two	DKO two	79.9	DKO	two	DKO two	180.4	DKO two	2.25782
2 hr 20.1.3	DKO	two	DKO two	12.5	DKO	two	DKO two	88.2	DKO two	7.056
2 hr 20.1.5	DKO	two	DKO two		DKO	two	DKO two	226.6	DKO two
2 hr 5445	DKO	two	DKO two	48.7	DKO	two	DKO two	123.6	DKO two	2.53799
2 hr 5449	DKO	two	DKO two	55.2	DKO	two	DKO two	136.3	DKO two	2.4692
3 hr 5442	DKO	three	DKO three	44.9	DKO	three	DKO three	91.7	DKO three	2.04232
3 hr 5443	DKO	three	DKO three	26.7	DKO	three	DKO three	77.3	DKO three	2.89513
3 hr 5444	DKO	three	DKO three	32.7	DKO	three	DKO three	71.6	DKO three	2.1896
3 hr 5885	DKO	three	DKO three	94.4	DKO	three	DKO three	143.8	DKO three	1.52331
3 hr 5886	DKO	three	DKO three	119.4	DKO	three	DKO three	244	DKO three	2.04355
3 hr 5887	DKO	three	DKO three	117	DKO	three	DKO three	262.1	DKO three	2.24017
