# Supplementary material for: ABC transporters P-gp and Bcrp do not limit the brain uptake of the novel antipsychotic and anticonvulsant drug cannabidiol in mice
Source: PeerJ. 2016 May 26;4:e2081. doi: 10.7717/peerj.2081 (PMC4888295; doi:10.7717/peerj.2081)
Supplement: Data S2 [file peerj-04-2081-s002.xlsx]

## Sheet: Sheet1
Animal ID	Strain	Time	RISP conc. (ng/g)	9-OH-RISP conc. (ng/g)	RISP (ng/ml)	9-OH-RISP (ng/ml)		Genotype + time	RISP B/P ratio	9-OH B/P ratio
B0	FVB	1 hr	145.5	29.2	285	111.7		FVB one	0.510526	0.261415
B1	FVB	1 hr	133.9	15.2	367.9	171.5		FVB one	0.363958	0.0886297
B2	FVB	1 hr	90.4	8.5	228.4	94.1		FVB one	0.395797	0.0903294
C8	FVB	1 hr	188.6	26.7	227.8	95.3		FVB one	0.827919	0.280168
C9	FVB	1 hr	116	27.9	307.2	128		FVB one	0.377604	0.217969
E4	FVB	1 hr	167.9	11.9	435.5	108.3		FVB one	0.385534	0.10988
E5	FVB	1 hr	275.7	106.6	283.5	77		FVB one	0.972487	1.38442
H2	FVB	1 hr	125.2	22.8	162	93.3		FVB one	0.77284	0.244373
D7	FVB	3 hr	50.2	47.9	82.2	115.8		FVB three	0.610706	0.413644
F7	FVB	3 hr	44.9	29.7				FVB three
F8	FVB	3 hr	111.8	173.3				FVB three
G1	FVB	3 hr	72.3	49.3	47.3	73.2		FVB three	1.52854	0.673497
G2	FVB	3 hr	42.6	21.2	69.3	99.6		FVB three	0.614719	0.212851
N5	FVB	3 hr	69.8	64.7	72.7	90.9		FVB three	0.96011	0.711771
A0	BCRP	1 hr	120.4	23	286.2	167.4		BCRP one	0.420685	0.137395
A1	BCRP	1 hr	112.1	9.6	262.8	112.5		BCRP one	0.42656	0.0853333
A2	BCRP	1 hr	157	43.6	151.9	96		BCRP one	1.03357	0.454167
A3	BCRP	1 hr	119.9	45.5	130.1	96		BCRP one	0.921599	0.473958
A4	BCRP	1 hr	113.7	30.4	134.4	99.2		BCRP one	0.845982	0.306452
B3	BCRP	1 hr	158.9	29.7	209.9	85.3		BCRP one	0.757027	0.348183
B4	BCRP	1 hr	91.9	9.9				BCRP one
D1	BCRP	3 hr	48	50.5	69.1	84.9		BCRP three	0.694645	0.594817
D2	BCRP	3 hr	29.1	16.3	104.1	178.3		BCRP three	0.279539	0.091419
D3	BCRP	3 hr	20.1	8.5	107.8	108.4		BCRP three	0.186456	0.0784133
D4	BCRP	3 hr	18.6	5.7	81.7	99		BCRP three	0.227662	0.0575758
D5	BCRP	3 hr	43.6	24.7	83.9	132.6		BCRP three	0.519666	0.186275
D6	BCRP	3 hr	26.3	24.1	38.5	81.8		BCRP three	0.683117	0.294621
C5	PGP	1 hr	744.9	152.3	431.7	147.2		PGP one	1.7255	1.03465
C7	PGP	1 hr	3393.7	850.7	503.8	150.6		PGP one	6.7362	5.64874
E7	PGP	1 hr	630.4	64.7	404.2	70		PGP one	1.55962	0.924286
I0	PGP	1 hr	4042.6	506.9	393	116.1		PGP one	10.2865	4.36606
I1	PGP	1 hr	3258.8	478.4	275.7	113.4		PGP one	11.8201	4.21869
K4	PGP	3 hr	1421	1350	92.4	126.1		PGP three	15.3788	10.7058
K5	PGP	3 hr	1446.6	519.8	178.6	151.7		PGP three	8.09966	3.4265
N0	PGP	3 hr	1296.5	849.3	136.7	187.1		PGP three	9.48427	4.53928
N1	PGP	3 hr	1616.8	2384.6	117.2	203.1		PGP three	13.7952	11.741
N2	PGP	3 hr	1645.3	1433.5	79.5	172		PGP three	20.6956	8.3343
H0	DKO	1 hr	1118.9	1027.3	151.7	205.5		DKO one	7.37574	4.99903
H1	DKO	1 hr	1443.2	788	224.3	127.8		DKO one	6.43424	6.16588
H4	DKO	1 hr	3054	1135.7	224.3	127.8		DKO one	13.6157	8.88654
H5	DKO	1 hr	1926.7	785.9	332.3	173.9		DKO one	5.79807	4.51926
H6	DKO	1 hr	2500.7	816.6				DKO one
I2	DKO	1 hr	3472.9	386.5	346.134	92.4652		DKO one	10.0334	4.17995
I3	DKO	1 hr	3275.1	451.1	355.411	143.773		DKO one	9.21497	3.13758
I4	DKO	1 hr	1750.6	349.9	175.53	55.445		DKO one	9.97324	6.31076
K0	DKO	3 hr	696.5	333.1	96.5496	81.1203		DKO three	7.21391	4.10625
K1	DKO	3 hr	718.9	827.4	135.465	271.254		DKO three	5.30691	3.05028
K2	DKO	3 hr	823.8	616.4	87.847	99.2465		DKO three	9.37767	6.2108
K3	DKO	3 hr	956.5	749	52.0104	101.72		DKO three	18.3906	7.36333
L1	DKO	3 hr	1242.6	812.8	88.3807	78.3481		DKO three	14.0596	10.3742
L2	DKO	3 hr	1196.8	820.5	153.075	163.605		DKO three	7.81837	5.01512
